# Supplementary material for: Antimicrobial Properties of Metal Nanoparticles and Their Oxide Materials and Their Applications in Oral Biology
Source: Hindawi journal article supplement (doi:10.1155/2022/2063265), 2022-01-01
Supplement: f1 [file 2063265.f1.docx]

**Table s1. The effect and mechanism of nanometal on drug-resistant and multi-drug resistant bacteria**

| Type of nanomaterials/Combination | Synthesis | Description  (size/shape) | Tested microorganisms | MIC(µg/ml) | MBC(µg/ml） | Antimicrobial  Mechanism | Conclusion | Ref. |
| --- | --- | --- | --- | --- | --- | --- | --- | --- |
| AuNPs | Chemically synthesized  methodology | 9 nm | murine ﬁbroblasts | Not mentioned | Not mentioned | Electrostatic interactions between particles and bacterial cell walls,  denaturation and interactions of intracellular proteins | As a wound dressing (the ability to absorb wound exudates is very important) or as a component of a drug delivery system (the swelling performance is related to the ability of the drug to be released from the wound) inside the material. | [27] |
| antimicrobial peptides (AMPs) coupled with AuNPs | Chemically synthesized  methodology | 4-5nm(bis(Vancomycin-AuNPs)  cystamide )  15nm(Vancomycin-AuNPs)  8.4nm(Vancomycin-AuNPs) | Vancomycin Resistant Enterococcus,  Vancomycinresistant  Staphylococcus aureus  (VRSA),  VRE1  (E. faecalis), VRE4 (E.  faecium), MRSA and  PDRAB | 2-4 µg/mlagainst VRE  And 8 µg/ml against E. Coli,  8 µg/mlagainst  VRSA,  8-32 µg/ml against  VRE1, VRE4, MRSA  and PDRAB | Not mentioned | Interfere with or dissolve the bacterial membrane to obtain a higher drug concentration at the site of action; interact with lipopolysaccharide (LPS) and protein in the bacterial outer membrane and deposit on the cell membrane. | The combination of AMPs and nanoparticles helps to improve the serum stability of peptides. It has a significant advantage over free AMPs in terms of antibacterial activity and can resist a variety of drug-resistant bacterial pathogens. | [4] |
| Phenylboronic acid derivative couplingAuNPs | Chemically synthesized  methodology | 4 ± 0.4 nm (A-AuNPs) and 3 ± 0.6 nm (M-AuNPs) | Escherichia coli (E. coli) ,  Multidrug-resistant Escherichia coli (MDR   1. coli) ,   Klebsiella pneumoniae (K. p),  Klebsiella pneumonia with capsule (K. p +) ,  Pseudomonas aeruginosa (P. a) ,  Staphylococcus aureus ypfPmutant (SA113),  Staphylococcus aureus (S. a),  Staphylococcus epidermidis (S. e) ,  Enterococcus faecalis (E. f) . | 2-6  6-64  6-64  2-64  3-64  6-64  6-64  2-64  3-64 | Not mentioned | Adhere to the bacterial cell wall, increase the permeability of the bacterial cell wall, and induce the destruction of the bacterial cell wall. | Treatment of complex infections caused by MDR bacteria. | [29] |
| Gentamycin sulfate AuNPs | Chemically synthesized  methodology | 3.55 ± 0.26 nm, spherical or elliptical | E. coli,  S. aureus,  MR S. aureus | 1  4  128 | 2  4  256 | KGM/gelatin@Au NPs/GS contains a large number of hydrophilic  Groups that endow the sponge material with better water retention, which  creates a moist recovery environment for the wound. | Heals wounds and kills resistant bacteria. | [30] |
| AuNPs | Chemically synthesized  methodology | 21nm, spherical | E. coli | Not mentioned | Not mentioned | Antibiotic effect and induction of macrophage function to produce anti-inflammatory response. | Used as a carrier to carry antibiotics to alleviate bacterial sepsis in mice induced by cecal ligation and puncture (CLP). | [31] |
| Conjugation of AuNPs with Antibiotics | Plant-mediated | mainly hexagonal, some are spherical and nanoprism shaped | Micrococcus luteus,  Bacillussubtilis,  Staphylococcus aureus, Streptococcus mutans, Lactobacillus acid-ophilus,  Escherichia coli, Pseudomonas aeruginosa,  Saccharomyces cerevi-siae, and Candida albicans. | 12.5±0.2  12.5 ± 0.0  12.5 ± 0.3  25 ± 0.2  25 ± 0.0  25 ± 0.4  6.25 ± 0.1  12.5 ± 0.0  12.5 ± 0.3 | Not mentioned | AuNPs have the potential of drug carriers. | It exhibits broad-spectrum antibacterial activity against oral pathogenic bacteria and fungi, as a possible tool for new therapeutic drugs. | [32] |
| Flavonoid cloverAuNPs | Plant-mediated | 12nm, spherical | Staphylococcusaureus, Enterobacter xiangfangensis, Bacillus licheniformis, Escherichia fergusonii, Acinetobacter pittii,  Pseudomonas aeruginosa, Aeromonas enteropelogenes  Proteus mirabilis. | < 50 | Not mentioned | Not mentioned | Treat respiratory tract infections caused by pathogenic bacteria without any side effects on the host. | [33] |
| AuNPs  The stem of T. cordifolia | Plant-mediated | 16.1nm,spherical | Pseudomonas aeruginosa | 1000 | Not mentioned | Against the biofilm of Pseudomonas aeruginosa, as the concentration of AuNP increases, the number of biofilm-forming cells decreases. | As an effective nano-antibiotic to combat biofilm-related infections caused by Pseudomonas aeruginosa. | [34] |
| Au-AgNPs | Chemically  synthesized  methodology | 30-40nm,spherical | S. aureus,  E. coli | 3  6 | Not mentioned | Produce intracellular reactive oxygen species, inhibit bacterial cell division (such as FtsZ positioning and formation of Z ring) and prevent bacterial growth. | Effectively used to heal skin wounds infected by MRSA and other pathogens, and does not produce drug resistance or adverse toxicity. | [42] |
| Ag-MSNs | Chemically  synthesized  methodology | 61.8±7.3 nm | S. aureus,  E. coli | 25  12.5 | Not mentioned | Combining tissue adhesion and antibacterial activity, it has good biocompatibility and high-efficiency antibacterial properties. | It has good antibacterial activity against Escherichia coli and Staphylococcus aureus. And the wound closure is safe and beautiful without causing any infection or side effects (wound repair). | [44] |
| AgNPs | Biosynthesis | 13 - 66 nm | Resistant to E.faecalis, P.aeruginosa, S. aureus, B.subtilis, E coli | Not mentioned | Not mentioned | Inhibit microbial growth | Silver nanoparticles (AgNPs) have good antibacterial effects against Gram-positive and Gram-negative bacteria, especially against drug-resistant Enterococcus faecalis and Pseudomonas aeruginosa. AgNPs show good inhibitory effect on human hepatocellular carcinoma (HepG2) cell line. | [45] |
| AgNPs | Green synthesis | 16nm | S. aureus, P. aeruginosa | Not mentioned | Not mentioned | Inhibit bacterial growth | The antibacterial activity of the material against Staphylococcus aureus and Pseudomonas aeruginosa reaches 90%, and can be used for many aspects such as disinfection of wastewater. | [46] |
| Ag2O2 NPs | Tight control of external stimuli with ultrasound and near-infrared light | <100 nm | S. aureus | Not mentioned | Not mentioned | Enhanced antimicrobial and anti-biofilm capabilities | Capable of accelerating skin wound closure in multidrug-resistant Staphylococcus aureus infections with excellent cellular and hemocompatibility. | [47] |
| AgNPs | Green synthesis | 30 nm- 80 nm | Candida albicans, Alternaria | Not mentioned | Not mentioned | Inhibit bacterial growth | Shows good antibacterial activity against all bacteria tested, moderate antifungal activity is observed against Candida albicans and Alternaria. | [48] |
| HAp/GO/Ag | Dip coating | 68 nm | E. coli | Not mentioned | Not mentioned | released Ag+ | The material enhances antibacterial activity without cytotoxicity, but also prevents electrolyte from entering the substrate and improves biocorrosion performance. | [49] |
| AgNPs | Soda lime glass | <20 nm | E. Coli、M. luteus、I. orientalis | Not mentioned | Not mentioned | Synergy in calcium | The material is expected to be a powerful antibacterial and antifungal inorganic agent.. | [50] |
| CuNPs@Tc | Plant-mediated | 63.3-143nm,spherical | S. aureus,  E. coli | Not mentioned | Not mentioned | Nanoparticle coated fabrics have antibacterial properties by inhibiting the growth of microorganisms. | Through the test of the durability of clothes, it is concluded that the effectiveness of coated cotton against gram-negative bacteria is 65%, and the effectiveness against gram-negative bacteria is 50%. This may be due to the coverage of copper nanometers with Heteroderma Due to particles. | [55] |
| Copper acetate hydrate CuNPs | Chemically  synthesized  methodology | <50 nm | S. aureus NCTC 4163  S. aureus ATCC 25923  S. aureus ATCC 6538  S.AureusATCC29213  S.EpidermidisATCC12228  S. EpidermidisATCC35984  Candida albicans ATCC 10231  CandidaalbicansATCC 90028  CandidaparapsilosisATCC22019 | 1.875  3.75  1.875  3.75  3.75  3.75  3.75  3.75  3.75 | Not mentioned | It is speculated that the sterilization mechanism of copper nanoparticles is similar to that of silver nanoparticles. The subsequent release of copper ions can bind to DNA molecules and cause helical structure disorder through cross-linking within and between nucleic acid strands | It has antibacterial activity against bacteria and fungi, and has a wide range of applications in reducing hospital infections, burn treatment, preventing bacterial and fungal colonization and repair, blood vessel transplantation and dental materials. | [56] |
| CuNPs | Soda lime glass powder | 5-50 nm | E. Coli,  M. luteus,  I. orientalis | Not mentioned | Not mentioned | The synergistic effect of calcium | The material's high bactericidal activity reaches a logarithmic increase (for copper content at 0.054 wt%), demonstrating its high antibacterial and antifungal activity. | [58] |
| CS-FeO | Plant-mediated | 20-90 nm, rod shape | E. coli,  B. Subtilis  S. aureus | Not mentioned | Not mentioned | Not mentioned | The prepared CS-FeO nanocomposite has higher antibacterial activity against Gram-positive and Gram-negative bacteria than FeO-NPs, and the surface modification of chitosan improves the biological performance of FeO-NPs. | [62] |
| FeO-NRs | Plant-mediated | 15.01±6.03 nm, rod shape | S. aureus,  P. aeruginosa,  E. coli,  Shigella,  Salmonella typhi,  P. multocida | Not mentioned | Not mentioned | Combines with sulfhydryl compounds in the respiratory group of bacterial cells and is toxic to bacterial strains. | The formulated FeO-NRs has high growth activity in inhibiting Staphylococcus aureus, Pseudomonas aeruginosa, Escherichia coli, Shigella, Salmonella typhimurium and Plasmodium multocida at low concentrations, and is a promising one. Bionanomaterials. | [63] |
| FeO-NPs | Chemically  synthesized  methodology | 25-40 nm, spherical | Staphylococcus aureus  Escherichia coli  Shigella dysentry | 13.21  12.95  12.63 | Not mentioned | NPs produce adsorption, which damages the bacterial cell wall responsible for maintaining the natural shape of the bacteria, resulting in cell death. | Has a good antibacterial effect. | [65] |
| α-Fe2O3 nanoparticles | Plant-mediated | 21.59 nm | Klebsiella spp.,  E. Coli,  Pseudomonas spp.,  S. aureus | Not mentioned | Not mentioned | It produces reactive oxygen species (ROS), oxidative stress caused by ROS, and the reaction of ions released by nanoparticles with sulfhydryl groups to show its antibacterial properties. | Synthetic -Fe2O3 nanoparticles have good degradation ability to ramazol yellow RR dye under sunlight, and have moderate antibacterial effect on gram-negative bacteria and gram-positive bacteria. | [66] |
| P-IONP | Plant-mediated | 42 ± 08 nm，multivariate shape | S. aureus,  E. coli | Not mentioned | Not mentioned | Changes at the molecular level due to nanoparticle exposure. | Synthetic P-IONP has antibacterial activity against gram-positive bacteria and gram-negative bacteria, but has high antibacterial activity against gram-negative bacteria and E. coli. | [67] |
| PMC-NPs | Plant-mediated | spherical | Staphylococcus aureus, Escherichia coli,  Shigella,  Pseudomonas aeruginosa | Not mentioned | Not mentioned | Not mentioned | It has inhibitory effect on the growth of Staphylococcus aureus, Escherichia coli, Shigella, Pseudomonas aeruginosa, Salmonella typhi and Pasteurella multocida | [60] |
| FeO-NRs | Plant-mediated | 15.01 ± 6.03 nm Rod shape | S. aureus,  P. aerugi-nosa,  E. coli,  Shigella,  Salmonella typhi,  P. multocida | Not mentioned | Not mentioned | It is toxic to bacterial strains by binding to sulfhydryl compounds in the respiratory group of bacterial cells | It has inhibitory effect on the growth of Staphylococcus aureus, Pseudomonas aeruginosa, Escherichia coli, Shigella, Salmonella typhi and Bacillus multocida. | [63] |
| alginate-capped iron-oxide NP-tobramycinconjugates | Chemically  synthesized  methodology | ~232nm，oblong,rounded-rectangular | Pseudomonas aeruginosa | 10–15μg/mL for planktonic  cells grown overnight in liquid broth,  32 μg/mL for 3-day  old bioflm cells,  50  µg/mL for 10-day old bioflms,  93.7 mg/mL for 60-day old bioflms | Not mentioned | It may be related to oxidative stress caused by reactive oxygen species (such as superoxide radicals (O2 -), singlet oxygen (1 O2), and hydroxyl radicals (-OH)) | Alginate-coated iron oxide nanoparticles and alginate-coated magnetite-tobramycin conjugates both have inhibitory effects. | [70] |
| ZnO-NPs | Chemically  synthesized  methodology | 35nm, polygon | Campylobacter jejuni, Salmonella typhimurium, Klebsiella pneumoniae,  Neisseria gonorrhoeae | Not mentioned | Not mentioned | Induces the production of reactive oxygen species in cells, the interaction between nanoparticles and bacteria, and subsequently destroys the release of bacterial cells and Zn2+ | Has a certain antibacterial activity | [73] |
| Ca-Ag modified nano TiO2 | Surface modification method | Porous network structure | Staphylococcus aureus | Not mentioned | Not mentioned | Silver will act on the bacterial cell wall, destroy the integrity of the cell membrane, and cause cell death. | It has certain antibacterial activity and is cytocompatible to MG-63 osteoblast-like cells. | [81] |
| Hybri Multifunctional Humic Acid TiO2-NPs | Solvothermal method | 6 nm | E. coli DH5a,  E. coli ATCC 35218,  Klebsiella pneumoniae ATCC 700503,  Pseudomonas aeruginosa ATCC 27355,  Enterococcus faecalis ATCC 29212,  Staphylococcus aureus ATCC 5538 P | 50 | Not mentioned | Produce ros-mediated cell damage with bactericidal activity. | Endows amoxicillin and tetracycline antibiotics with high isolation efficiency, and enhances the significant OS-mediated bactericidal performance against many pathogenic gram-negative bacteria. | [82] |
